# Supplementary material for: Decoupling between the response of coral calcifying fluid pH and calcification to ocean acidification
Source: PubMed Central journal article supplement (PMC5548905; doi:10.1038/s41598-017-08003-z), 2017-08-08
Supplement: 41598_2017_8003_MOESM1_ESM.pdf [file 41598_2017_8003_MOESM1_ESM.pdf]

# Decoupling between the response of coral calcifying fluid pH and calcification to ocean acidification

S. Comeau, C. E. Cornwall, M. T. McCulloch

5

10 **Supplementary Figure 1:** Individual calcification rates and estimates of pH in the calcifying fluid ( $\text{pH}_{\text{cf}}$ ) of the corals *Acropora youngae* (grey triangles) and *Pocillopora damicornis* (black dots) incubated during 8 weeks under  $\text{pH} = 8.09, 7.81,$  and  $7.63$ .

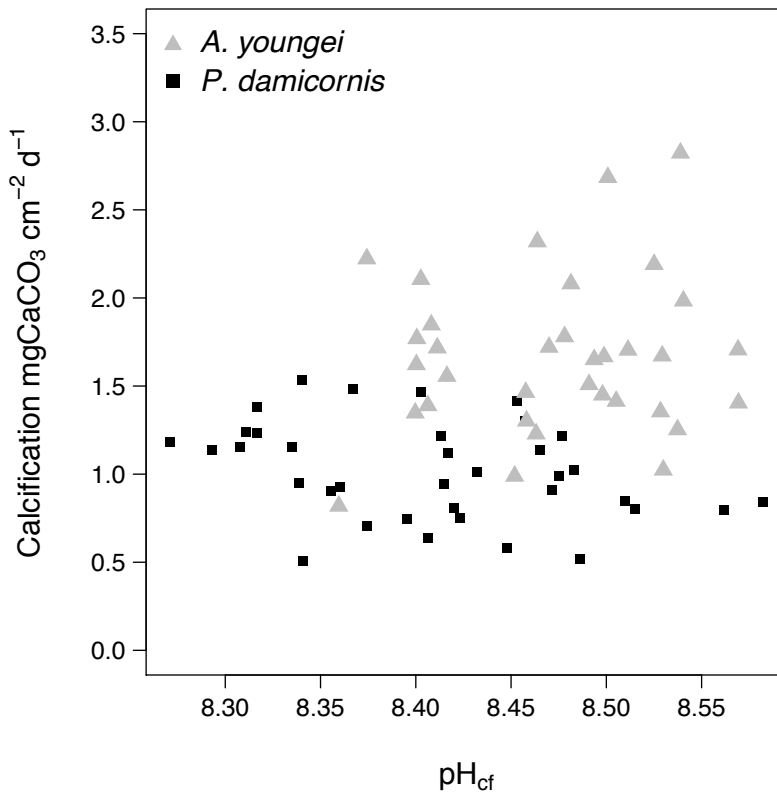

15

20 **Supplementary Figure 2:** Relationship between B/Ca ratios and  $\delta^{11}\text{B}$  in the corals *A. pulchra* (grey triangles) and *P. damicornis* (black squares). For both corals, the relationships between B/Ca ratios and  $\delta^{11}\text{B}$  were best fit with linear models ( $\text{B/Ca} = 31.6 \delta^{11}\text{B} - 124$ ,  $p < 0.001$ ,  $R^2 = 0.78$ , and  $\text{B/Ca} = 25.8 \delta^{11}\text{B} + 98.5$ ,  $p < 0.001$ ,  $R^2 = 0.57$ , for *A. youngei* and *P. damicornis*, respectively).

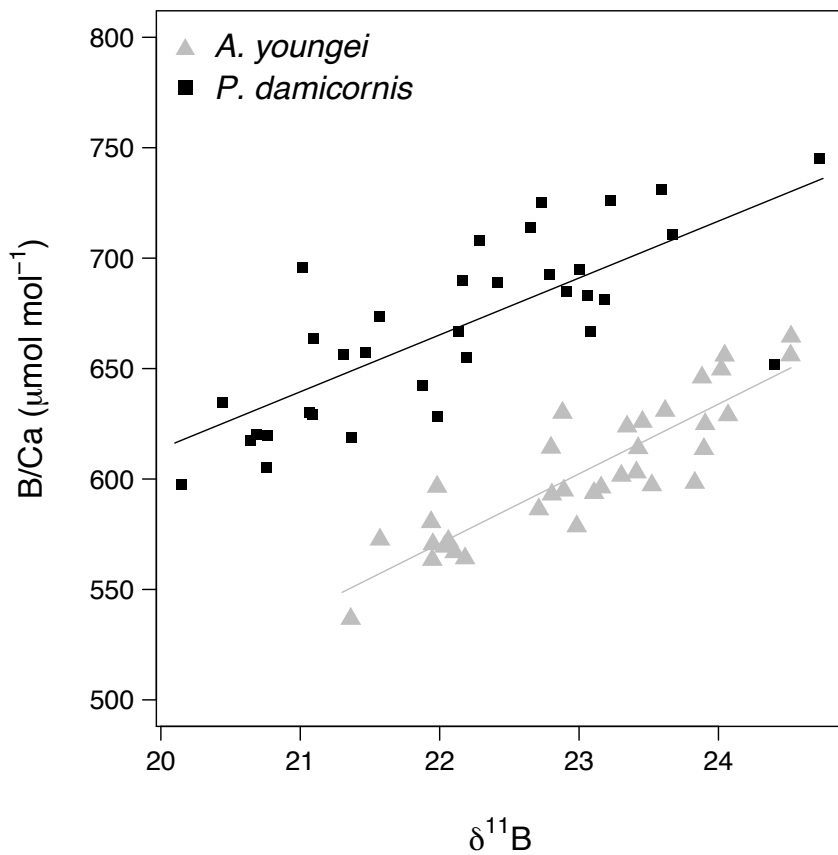

25 **Supplementary Figure 3:** Comparison of  $\delta^{11}\text{B}$  values as a function of seawater pH in corals from the genus *Acropora*.  $\delta^{11}\text{B}$  values are shown for the present study (grey squares), Honish et al.<sup>41</sup> (black circles), Reynaud et al.<sup>42</sup> (black triangles), and Tanaka et al.<sup>43</sup> (black diamonds).

30

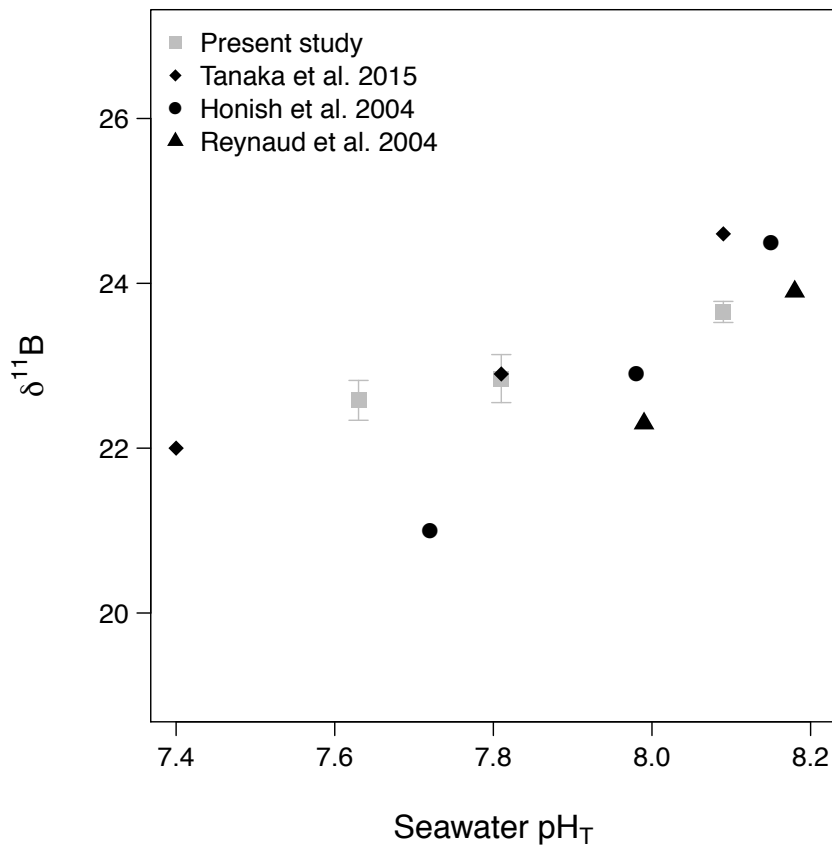

35 **Supplementary Figure 4:** Relationship between  $\text{pH}_{\text{CF}}$  and estimates of dissolved inorganic carbon concentration in the calcifying fluid ( $\text{DIC}_{\text{CF}}$ ). Measurements were done on the corals *A. pulchra* (grey triangles) and *P. damicornis* (black squares).

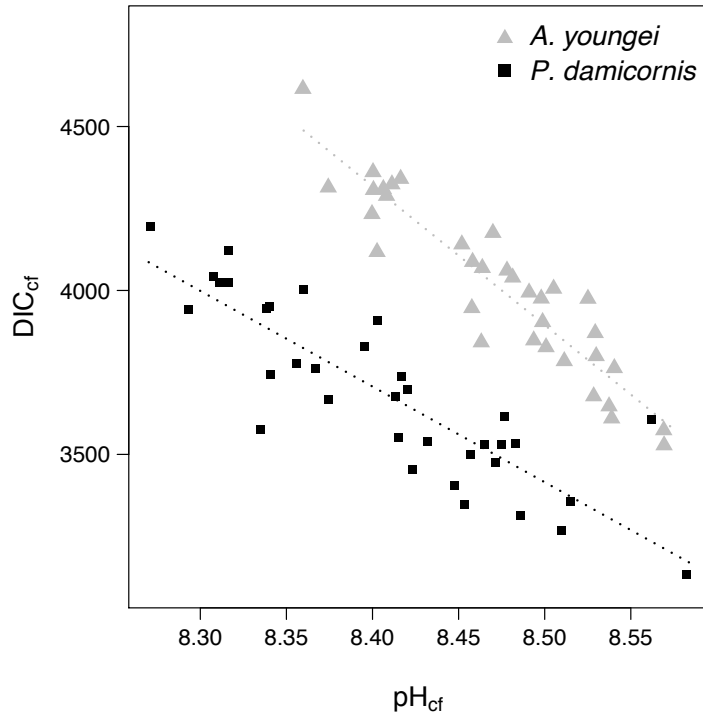

40 **Supplementary Figure 5:** Relationship between  $\text{pH}_{\text{cf}}$  and estimates of aragonite saturation state in the calcifying fluid ( $\Omega_{\text{CF}}$ ). Measurements were done on the corals *A. pulchra* (grey triangles) and *P. damicornis* (black squares).

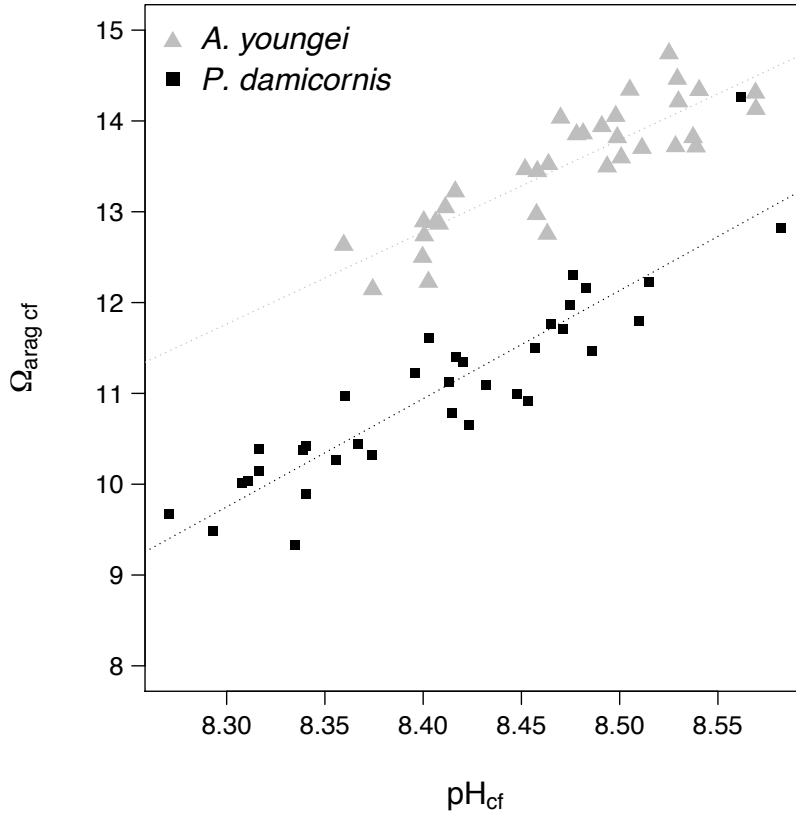

45

**Supplementary Table 1:** Individuals measurements of  $\delta^{11}\text{B}$  and B/Ca made on the corals *A. youngae* incubated for 8 weeks under pH 8.1, 7.8 and 7.6.

| Species           | Treatment | $\delta^{11}\text{B}$ | pH <sub>cf</sub> | B/Ca  | DIC <sub>cf</sub> | Calcification |
|-------------------|-----------|-----------------------|------------------|-------|-------------------|---------------|
| <i>A. youngae</i> | 8.1       | 23.16                 | 8.48             | 596.2 | 4040              | 2.08          |
|                   | 8.1       | 23.83                 | 8.53             | 598.3 | 3975              | 2.19          |
|                   | 8.1       | 23.9                  | 8.53             | 613.6 | 3870              | 1.67          |
|                   | 8.1       | 22.89                 | 8.46             | 594.8 | 4069              | 2.32          |
|                   | 8.1       | 23.52                 | 8.51             | 597.2 | 4006              | 1.41          |
|                   | 8.1       | 23.41                 | 8.50             | 603   | 3976              | 1.45          |
|                   | 8.1       | 24.07                 | 8.54             | 628.9 | 3763              | 1.98          |
|                   | 8.1       | 24.04                 | 8.54             | 655.9 | 3610              | 2.82          |
|                   | 8.1       | 23.42                 | 8.50             | 614   | 3904              | 1.67          |
|                   | 8.1       | 23.62                 | 8.51             | 630.9 | 3785              | 1.70          |
|                   | 8.1       | 24.52                 | 8.57             | 656   | 3574              | 1.71          |
|                   | 8.1       | 24.06                 | 8.54             | 653   | 3625              | 2.32          |
|                   | 7.8       | 22.98                 | 8.47             | 578.6 | 4176              | 1.72          |
|                   | 7.8       | 22.18                 | 8.42             | 564.1 | 4341              | 1.56          |
|                   | 7.8       | 22.06                 | 8.41             | 572   | 4289              | 1.85          |
|                   | 7.8       | 23.11                 | 8.48             | 593.7 | 4061              | 1.78          |
|                   | 7.8       | 22.81                 | 8.46             | 593   | 4087              | 1.30          |
|                   | 7.8       | 23.3                  | 8.49             | 623.5 | 3853              | 0.76          |
|                   | 7.8       | 22.31                 | 8.42             | 617.9 | 3955              | 1.03          |
|                   | 7.8       | 21.98                 | 8.40             | 596.5 | 4118              | 2.11          |
|                   | 7.8       | 23.34                 | 8.49             | 623.8 | 3848              | 1.65          |
|                   | 7.8       | 24.52                 | 8.57             | 664.5 | 3528              | 1.40          |
|                   | 7.8       | 21.57                 | 8.37             | 572.6 | 4314              | 2.22          |
|                   | 7.8       | 23.88                 | 8.53             | 646   | 3678              | 1.35          |
|                   | 7.6       | 21.36                 | 8.36             | 536.7 | 4615              | 0.82          |
|                   | 7.6       | 21.94                 | 8.40             | 580.5 | 4233              | 1.35          |
|                   | 7.6       | 22.71                 | 8.45             | 586.3 | 4141              | 0.99          |
|                   | 7.6       | 23.9                  | 8.53             | 624.9 | 3800              | 1.02          |
|                   | 7.6       | 22.11                 | 8.41             | 566.9 | 4324              | 1.72          |
|                   | 7.6       | 23.3                  | 8.49             | 601.5 | 3994              | 1.51          |
|                   | 7.6       | 21.95                 | 8.40             | 563.4 | 4361              | 1.62          |
|                   | 7.6       | 22.03                 | 8.41             | 569.4 | 4310              | 1.39          |
|                   | 7.6       | 22.88                 | 8.46             | 630   | 3842              | 1.23          |
|                   | 7.6       | 24.02                 | 8.54             | 649.6 | 3647              | 1.25          |
|                   | 7.6       | 21.95                 | 8.40             | 570.5 | 4307              | 1.77          |
|                   | 7.6       | 22.8                  | 8.46             | 614.2 | 3947              | 1.46          |

**Supplementary Table 2:** Individuals measurements of  $\delta^{11}\text{B}$  and B/Ca made on the corals *P. damicornis* incubated for 8 weeks under pH 8.1, 7.8 and 7.6.

| Species              | Treatment | $\delta^{11}\text{B}$ | pH <sub>cf</sub> | B/Ca  | DIC <sub>cf</sub> | Calcification |
|----------------------|-----------|-----------------------|------------------|-------|-------------------|---------------|
| <i>P. damicornis</i> | 8.1       | 22.73                 | 8.45             | 725.1 | 3347              | 1.41          |
|                      | 8.1       | 22.14                 | 8.41             | 666.7 | 3675              | 1.22          |
|                      | 8.1       | 22.79                 | 8.46             | 692.6 | 3500              | 1.30          |
|                      | 8.1       | 23.01                 | 8.47             | 694.8 | 3476              | 0.91          |
|                      | 8.1       | 23.18                 | 8.48             | 681.1 | 3535              | 1.02          |
|                      | 8.1       | 24.40                 | 8.56             | 651.8 | 3606              | 0.80          |
|                      | 8.1       | 23.67                 | 8.51             | 710.9 | 3356              | 0.80          |
|                      | 8.1       | 23.59                 | 8.51             | 731.2 | 3267              | 0.85          |
|                      | 8.1       | 24.72                 | 8.58             | 745.1 | 3133              | 0.84          |
|                      | 8.1       | 21.99                 | 8.40             | 628.5 | 3907              | 1.47          |
|                      | 8.1       | 23.08                 | 8.48             | 667   | 3616              | 1.22          |
|                      | 7.8       | 22.41                 | 8.43             | 689.2 | 3540              | 1.01          |
|                      | 7.8       | 21.07                 | 8.34             | 630.3 | 3944              | 0.95          |
|                      | 7.8       | 21.09                 | 8.34             | 629.1 | 3950              | 1.54          |
|                      | 7.8       | 22.19                 | 8.42             | 654.8 | 3739              | 1.12          |
|                      | 7.8       | 21.31                 | 8.36             | 656.3 | 3777              | 0.90          |
|                      | 7.8       | 21.47                 | 8.37             | 657.4 | 3763              | 1.48          |
|                      | 7.8       | 22.28                 | 8.42             | 708   | 3453              | 0.75          |
|                      | 7.8       | 23.23                 | 8.49             | 726   | 3313              | 0.52          |
|                      | 7.8       | 22.91                 | 8.47             | 685   | 3532              | 1.14          |
|                      | 7.8       | 23.06                 | 8.47             | 683.3 | 3531              | 0.99          |
|                      | 7.8       | 20.76                 | 8.32             | 605.2 | 4121              | 1.23          |
|                      | 7.8       | 22.24                 | 8.42             | 661.4 | 3699              | 0.81          |
|                      | 7.6       | 20.76                 | 8.32             | 619.5 | 4026              | 1.38          |
|                      | 7.6       | 20.64                 | 8.31             | 617.5 | 4044              | 1.15          |
|                      | 7.6       | 21.02                 | 8.33             | 695.7 | 3575              | 1.15          |
|                      | 7.6       | 21.57                 | 8.37             | 673.8 | 3666              | 0.71          |
|                      | 7.6       | 21.10                 | 8.34             | 663.5 | 3745              | 0.50          |
|                      | 7.6       | 20.44                 | 8.29             | 634.7 | 3941              | 1.14          |
|                      | 7.6       | 21.88                 | 8.40             | 642.3 | 3829              | 0.74          |
|                      | 7.6       | 22.65                 | 8.45             | 713.8 | 3405              | 0.58          |
|                      | 7.6       | 22.16                 | 8.41             | 689.9 | 3550              | 0.95          |
| 7.6                  | 21.37     | 8.36                  | 618.8            | 4002  | 0.93              |               |
| 7.6                  | 20.69     | 8.31                  | 620.2            | 4024  | 1.24              |               |
| 7.6                  | 20.15     | 8.27                  | 597.5            | 4196  | 1.18              |               |
